# Supplementary material for: Cross species/genera transferability of simple sequence repeat markers, genetic diversity and population structure analysis in gladiolus (Gladiolus × grandiflorus L.) genotypes
Source: PeerJ. 2023 Sep 7;11:e15820. doi: 10.7717/peerj.15820 (PMC10493085; doi:10.7717/peerj.15820)
Supplement: Supplemental Information 2 [file peerj-11-15820-s002.xls]

## Sheet: Table S2
Table S2. SSR markers selected for the study, primer sequence, amplification type and annealing temperature
Sl. No	Marker Name	Forward Primer (5'-3')	Reverse Primer (5'-3')	A/NA	Tm (°C)	Allele size (bp)	Nature of allele
Chloroplast derived SSRs (cPSSRs) of Gladiolus
1	G1SSR	CCTTGGTATGGAAACCTGCTAA	ATAGATCCACAATTTCTCCCCA	A	60	320	Monomorphic
2	G2SSR	GGTATGGAAACCTGCTAAGTGG	TAGATCCACAATTTCTCCCCAT	A	60	310	Monomorphic
3	G3SSR	GGAAGCTGTTCTAACGAATGGA	TATTGGGGATAGAGGGACTTGA	A	60	370	Monomorphic
4	G4SSR	GGAGACTGACTAGGGCAAAAGA	AACTCCTTGACGCATTACGACT	A	60	380	Monomorphic
5	G5SSR	GCTCACAACAATAATCCTTCCC	CAATGAACTCAGCAATACCAGC	A	60	270-300	Polymorphic
6	G6SSR	GAAGAAGCGTGAGAAATCCATA	GGACCAACCGCAATAAATAA	A	60	350	Monomorphic
7	G7SSR	GTGTCTTCGGTGCTTTTCTCTT	CAGCGATAACCTAGAACGAACA	A	60	260-320	Polymorphic
8	G8SSR	TCTATGTCAGTGCTCTACCGGA	GAAGCAAACGAGTCTGTGGAC	A	60	280-300	Polymorphic
9	G9SSR	TATAGAGGAATGCGTGTCCGAT	TACTGCATGACGAGGAAATCAC	A	60	400-420	Polymorphic
10	G10SSR	TGCCACTCCAGCATAACTTCTA	ACTCCTTTTCCTCCCATTCTTC	A	60	310-330	Polymorphic
11	G11SSR	AAAGTCCCTCCTCTCCTCTGAT	GAGCTTGTTACTGAACGGAACC	A	60	480-510	Polymorphic
12	G12SSR	GGCATCCTTCCTCTCCGT	CGGCCTTGGGTGTAGAAGTAG	A	60	200-240	Polymorphic
Genomic SSRs from Gladiolus palustris
13	GP1	TTCTGCAAAGCTAACAGGCG	CCACTGCCATTATCGGTCGA	NA	-	NA	-
14	GP2	TTGTTACTGGTGCGGACTCC	CAGGTCCGATTGCTTGAGGA	A	58	210-270	Polymorphic
15	GP3	TTTGGGACGGGTATGCGTAG	TTCGCTTTCGTGGAAGTCCA	A	55	250-300	Monomorphic
16	GP4	ATGCCTTTGTCCTCTCACCT	TTTGTCCCTAATTGGAACACGTC	A	(59°C-54 °C, -0.5 °C per cycle)	180-310	Polymorphic
17	GP5	CGGGAATAGCAACTACCCGG	GTTGCCCTTGCGGTTGATC	A	55	110	Monomorphic
18	GP6	ATTGCCAAGGAGGTACAGGC	GCAAACCCACTCTGCTTCCT	A	54	110	Monomorphic
19	GP7	CCAAGTAAGTGATGGCGGC	GGGTCTAGAGAAGGCTTGGG	A	56	190-210	Polymorphic
20	GP8	GTGGGTTCCAAGCTTGCATG	TCATTGGCCGCGACAGAG	A	56	≈180-200	Not scorable
21	GP9	TGAAACCCTACACGTAACCCT	ATGTAGGGTGATGGTGGCTG	NA	-	NA	-
22	GP10	ACATTCCTATTTGGACGGTCCA	AGTTCCCTAGTCATCTATGGCT	NA	-	NA	-
23	GP11	ACGTGAGTGATCAATTAAAGGGC	CAACAGCACTGTGAGCACC	NA	-	NA	-
24	GP12	ATCCCTTTCCTAATTCCTTCCC	TGATGAAGAGGATTCCGACGAC	A	54	180	Monomorphic
25	GP13	AAACCCTCACTTCGGAGATCA	TAAAGTCAGTCAGCTGTAACACTG	A	54	280-300	Polymorphic
26	GP14	TCGGAAGGTAACAGAGGGAAC	GTCGAAACAGAGGAGATCGGG	NA	-	NA	-
27	GP15	GGGTCATCGCCTGTCATGAA	TCGTATCGGCTTGTTGGCTG	A	54	190-220	Polymorphic
EST SSRs from Iris spp.
28	IM9	TGTGTAAGAAGAAGTGCAGTTTGA	TGGAGCCTCTGGTACTTGCT	NA	-	NA	-
29	IM27	ACTGCTCTTGCATTTTACTTC	ATTACGAATTGCTTGCGTGAG	A	52	220-260	Monomorphic
30	IM31	AAGCAAAAGGTTTTCCATTCC	GTTTCTTGTCGAGGAACATGC	A	52	300-420	Polymorphic
31	IM37	AGAGAGGTGAGGTGAGGGTTT	CTTCCATCGTGTCCGAGTATG	NA	-	-	-
32	IM38	TCCTCCCTCACTCTCTTCCAT	AAAGCTCAGGCTACGCACAT	NA	-	-	-
33	IM39	CCCTAGCAAACATCTCTTCCA	TGTTATCAGCAAGCAGTCCAG	A	(59-54 °C, -0.5 °C per cycle)	380-500	Polymorphic
34	IM46	GAAGTTGGGAAACGACCATTA	GGGTTATGGTTAGGGTTAGGG	NA	-
35	IM86	GGGTTTGTATTGTTTGTTGGAGA	GGGTGATGTGGTCCTTGTAGA	A	60	200-220	Polymorphic
36	IM108	TCTCCTCCTGTCCGTCTATCC	AGTCGTCCAAATCTCCGAACT	A	(50°C- 45°C, -0.5 °C per cycle)	320-390	Polymorphic
37	IM112	ACGAGAAGAAGGAAGCCAAAC	TCTCAACAAACATAACGGCAAA	A	(55°C– 50 °C, -0.5 °C per cycle)	200-300	Not scorable
38	IM113	GCAAGCATACGTTCCACAAGT	GCGACACATCATACACAAACG	NA	-	-	-
39	IM114	CAAGTGTTACAAAGTGAGAAGAAGGA	ATTCTCCAGAAGTCCGACACA	A	60	620	Monomorphic
40	IM123	GTTTCATGGAGGAGTTGCAGT	TATCTTGCGGGTCTTCTTGG	A	(50°C- 45°C, -0.5°C per cycle)	320	Monomorphic
41	IM151	TTGTTCTCAGTCCAGCTCCAG	TCTTCTCCTCCACCTCCTGTT	A	52	580-850	Monomorphic
42	IM221	CCTTTCCGTTCCATTCTAGAGAC	CCAAACTCTCTCCCTTGACCT	NA	-	-	-
43	IM223	AATCATCACCCACCTCCATTT	TCATCCACAATTAGGGTTCCA	NA	-	-	-
44	IM224	AGAGAAGAGAGCATGGCGATA	GCGAGAAGTGGCATAAAGAGA	A	46	200-280	Polymorphic
45	IM234	ACCAAATGATGGCTGCTGTTA	CAAGAGTTCCGTTGAGGTGAG	NA	-	-	-
46	IM242	CCATCGTCTATCTCCACTCCA	GGACTGCTCCGATAGCTTCTT	NA	-	-	-
47	IM226	GTTGTCTACCATGTCCAACTTCC	TATTGTGGTGTCCCATGCTTT	NA	-	-	-
48	IM309	TGAAATCCAAAGCCAAACAAG	GCTCGTACTTCTCCATTGCTG	NA	-	-	-
49	IM408	AAGAAACCATAATATACAAATTGAAG	GCTCGTTGAGGAAGATGACAG	NA	-	-	-
50	IM400	CCCACTTTCTCATTCCTCTCC	CTGCAGAAGAAGAGCTCGACA	A	52	550	Monomorphic
51	IM158	CCAACCTACCAATCCCTCTTC	GATTAGCCAGCAGTCCTCCTT	NA	-	-	-
52	IM60	TACTTGGAGTTGTGGCTGGTT	AGATTGGAGAAAGGGAAGCAC	A	54	200	Monomorphic
Genomic SSRs from Crocus sativus
53	Cs2	ATACGGTAACATCAGGAAG	AGTAATCCACGCGTCAAGGT	A	52	550	Monomorphic
54	Cs8	GTGTAATGAATGGGATATATGGC	CCTTCCAACTGTGAAATAATTCC	NA	-	-	-
55	Cs10	GGATGTACTTAGGTTGTG	GGAAACCCTAACTAGGT	A	52	≈ 450	Not scorable
56	Cs11	CCCAACTGACCTTCCAACTG	GTTGTTATGATGGTCTGGCC	A	52	≈ 500	Not scorable
57	Cs20	CAATCTTTACATAGTGAGGC	GTATTCTGGTCAGTTCAGTG	NA	-	-	-
58	Cs21	TACCCTATAAAGAGTGGACA	GCTGCCTAGTAATGTGTAAG	A	54	120-160	Monomorphic
59	Cs28	AACCACTGAGGAAGGAC	GGTAGAATACCTTATCGGTT	A	52	≈150	Not scorable
Genomic SSRs from Herbertia zebrina
60	HZ4	TAGGCCCCACCAACGTATAA	AACACGTCATCTTCGTCTTCC	NA	-	-	-
61	HZ5	TTGGGTTGTATCTCGTATCTGG	TGCCATGTACATCCCTTAAATC	NA	-	-	-
Genomic SSRs from Sysirinchium micranthum
62	SM-A10	TATTTGCTGATTTCTTGTTTTA	TCTGTATGAATAGCCTCTTTTT	NA	-	-	-
63	SMB5	ATTATCAGCCAAAACAAAGAAGG	TAGCCGGTGCAATAGGTAAAG	NA	-	-	-
Genomic SSRs from ITS regions (Intergenic spacers)
64	psbA F -trnH R	GTTATGCATGAACGTAATGCTC	CGCGCATGGTGGATTCACAAATC	A	58	650	monomorphic
65	trnL F-trnH R	AAAATCGTGAGGGTTCAAGTC	GATTTGAACTGGTGACACGAG	A	58	260	monomorphic
Note: A – Amplified; NA – Not amplified; Tm -Annealing temperature
