# Supplementary material for: Cross species/genera transferability of simple sequence repeat markers, genetic diversity and population structure analysis in gladiolus (Gladiolus × grandiflorus L.) genotypes
Source: PeerJ. 2023 Sep 7;11:e15820. doi: 10.7717/peerj.15820 (PMC10493085; doi:10.7717/peerj.15820)
Supplement: Supplemental Information 3 [file peerj-11-15820-s003.xls]

## Sheet: Table S3
Table S3. Source of SSRs and their amplification pattern in gladiolus
Sl. No	Species/genera	Type of marker	No. of screened primers	No. of amplified primers	Amplification %	No. of Polymorphic markers
1	Gladiolus spp.	Chloroplast SSRs	12	12	100	7
2	Gladiolus palustris	Genomic SSRs	15	10	66.66	5
3	Iris spp.	EST derived SSRs	25	12	48	5
4	Crocus sativus	Genomic SSRs	7	5	71.42	0
5	Herbertia zebrina	Genomic SSRs	2	0	0	0
6	Sysirinchium micranthum	Genomic SSRs	2	0	0	0
7	Chloroplast DNA regions (Intergenic spacers)	Chloroplast SSRs	2	2	100	0
	Total		65	41	63.07	17
