# Supplementary material for: Cross species/genera transferability of simple sequence repeat markers, genetic diversity and population structure analysis in gladiolus (Gladiolus × grandiflorus L.) genotypes
Source: PeerJ. 2023 Sep 7;11:e15820. doi: 10.7717/peerj.15820 (PMC10493085; doi:10.7717/peerj.15820)
Supplement: Supplemental Information 4 [file peerj-11-15820-s004.xls]

## Sheet: Table S4
Table S4. The Ewens-Watterson Test for Neutrality of SSR loci for overall gladiolus genotypes
Locus	Obs. F	Min F	Max F	Mean*	SE*	L95*	U95*
G5	0.36	0.25	0.96	0.6	0.03	0.32	0.93
G7	0.78	0.25	0.96	0.59	0.03	0.32	0.93
G8	0.42	0.33	0.98	0.69	0.04	0.36	0.98
G9	0.89	0.5	0.99	0.82	0.03	0.5	0.99
G10	0.69	0.25	0.96	0.59	0.03	0.31	0.94
G11	0.4	0.33	0.98	0.7	0.03	0.39	0.98
G12	0.3	0.25	0.96	0.6	0.03	0.32	0.93
GP2	0.94	0.33	0.97	0.69	0.03	0.37	0.97
GP4	0.58	0.17	0.92	0.43	0.02	0.23	0.81
GP7	0.36	0.33	0.98	0.7	0.03	0.38	0.96
GP13	0.37	0.33	0.98	0.69	0.03	0.38	0.98
GP15	0.36	0.25	0.96	0.59	0.03	0.32	0.94
IM31	0.31	0.25	0.96	0.58	0.03	0.32	0.93
IM86	0.86	0.5	0.99	0.83	0.03	0.5	0.99
IM108	0.62	0.5	0.99	0.81	0.03	0.5	0.99
IM39	0.84	0.33	0.97	0.69	0.03	0.38	0.97
IM224	0.68	0.25	0.96	0.59	0.03	0.32	0.93
*These statistics were computed upon 1000 permutations for each loci. Observed F value (sum of square of allelic frequency) highlighted in bold lied outside the lower and upper limit of 95% confidence interval.
