# Supplementary material for: Cross species/genera transferability of simple sequence repeat markers, genetic diversity and population structure analysis in gladiolus (Gladiolus × grandiflorus L.) genotypes
Source: PeerJ. 2023 Sep 7;11:e15820. doi: 10.7717/peerj.15820 (PMC10493085; doi:10.7717/peerj.15820)
Supplement: Supplemental Information 5 [file peerj-11-15820-s005.xls]

## Sheet: Table S6
Table S5 Summary of marker wise genetic diversity measures for all the gladiolus genotypes
Locus	Na	Ne	I	Ho	He	F	Nm	h
G5	4	2.81	1.15	0.53	0.64	0.18	45.02	0.64
G7	4	1.28	0.47	0.09	0.22	0.57	7.08	0.22
G8	3	2.39	0.94	0.19	0.58	0.67	0.31	0.58
G9	2	1.13	0.23	0	0.11	1	3.7	0.11
G10	4	1.45	0.66	0.21	0.31	0.33	18.25	0.31
G11	3	2.51	0.99	0.3	0.6	0.5	2.25	0.6
G12	4	3.35	1.27	0.56	0.7	0.2	82.7	0.7
GP2	3	1.07	0.16	0.06	0.06	-0.03	65.33	0.06
GP4	6	1.74	0.79	0.53	0.42	-0.26	60.17	0.42
GP7	3	2.78	1.06	0.38	0.64	0.41	1.52	0.64
GP13	3	2.7	1.04	0.35	0.63	0.44	3.2	0.63
GP15	4	2.77	1.18	0.62	0.64	0.03	371.47	0.64
IM31	4	3.22	1.25	0.75	0.69	-0.09	10.44	0.69
IM86	2	1.16	0.26	0.12	0.14	0.12	4.16	0.14
IM108	2	1.61	0.57	0.51	0.38	-0.34	69.5	0.38
IM39	3	1.2	0.34	0.15	0.16	0.08	144.84	0.16
IM224	4	1.48	0.63	0.26	0.32	0.19	38.4	0.32
Mean	3.41	2.04	0.76	0.33	0.43	0.24	54.61	0.43
±SE	0.24	0.2	0.09	0.05	0.05	0.08
Note: Na = observed number of alleles; Ne = number of effective alleles; I = Shannon's information index; Ho = observed heterozygosity; He = expected heterozygosity; F = fixation index; h= Nei’s gene diversity; Nm = gene flow
