# Supplementary material for: Cross species/genera transferability of simple sequence repeat markers, genetic diversity and population structure analysis in gladiolus (Gladiolus × grandiflorus L.) genotypes
Source: PeerJ. 2023 Sep 7;11:e15820. doi: 10.7717/peerj.15820 (PMC10493085; doi:10.7717/peerj.15820)
Supplement: Supplemental Information 7 [file peerj-11-15820-s007.xls]

## Sheet: Table S7
Table S7 Analysis of molecular variance (AMOVA) and F- statistics differentiating subpopulations
Source	df	SS	MS	Est. var.	variance (%)	P value	F-statistics	value
Among subpopulations	1	44.38	44.38	0.46	0.0986	0	Fst	0.1
Among individuals within subpopulations	82	482.35	5.88	1.7	0.3655	0	Fis	0.41
Among individuals within total population	84	209	2.49	2.49	0.5359	0	Fit	0.46
Total	167	735.72		4.65	1
