# Supplementary material for: Cross species/genera transferability of simple sequence repeat markers, genetic diversity and population structure analysis in gladiolus (Gladiolus × grandiflorus L.) genotypes
Source: PeerJ. 2023 Sep 7;11:e15820. doi: 10.7717/peerj.15820 (PMC10493085; doi:10.7717/peerj.15820)
Supplement: Supplemental Information 8 [file peerj-11-15820-s008.xls]

## Sheet: Table S8
Table S8 Summary of genetic differentiation and heterozygosity statistics between subpopulations
Sub populations	S1	S2
Sample size (N)*	35	37
Na	3.12±0.26	3.12±0.17
Ne	1.99±0.21	1.84±0.17
I	0.73±0.10	0.69±0.08
Ho	0.34±0.05	0.32±0.06
He	0.41±0.06	0.39±0.05
F	0.12±0.06	0.22±0.09
Polymorphic loci (%)	0.9412	1
Note: Na = observed number of alleles; Ne = number of effective alleles; I = Shannon's information index; Ho = observed heterozygosity; He = expected heterozygosity; F = fixation index; h= Nei’s gene diversity; Havg = average heterozygosity; Nm = gene flow. * 12 genotypes were excluded from both subpopulations as they were assigned as admixture.
