# Supplementary material for: Cross species/genera transferability of simple sequence repeat markers, genetic diversity and population structure analysis in gladiolus (Gladiolus × grandiflorus L.) genotypes
Source: PeerJ. 2023 Sep 7;11:e15820. doi: 10.7717/peerj.15820 (PMC10493085; doi:10.7717/peerj.15820)
Supplement: Supplemental Information 9 [file peerj-11-15820-s009.xls]

## Sheet: Table S1
Table S1. The details of gladiolus genotypes involved in the present study
Genotype ID	Genotype name	Origin	Parentage	Place of collection	Main flower colour (As per RHS colour chart)	Plant height (cm)	Flowering time (days required to flowering)
1	Anglia	Exotic	Eloise × Rosemarie Pfitzer	ICAR-IARI, New Delhi	Fan1, Yellow group 8(B)	49.08	110.33
2	Amethyst	Exotic	Lavender Puff × Tropic Sea	CSIR-NBRI, Lucknow	Fan2, Purple - Violet group N80 (C)	50.5	100.17
3	Pusa Gunjan	Indian	White Oak × Oscar	ICAR-IARI, New Delhi	Fan1, Orange group 27(A)	61	100.67
4	Punjab Glad 1	Indian	Happy End × True Yellow	PAU, Ludhiana	Fan1, Orange-Red Group 33(D)	55.58	93
5	Aldebaran	Exotic	Unknown	CSIR-NBRI, Lucknow	Fan1, Yellow group 9(D)	63.17	106.5
6	Fire Flame	Exotic	(Big Top × Crystal × Red Ruffle) × (Vagabond Prince × New Era × Rich)	ICAR-IIHR, Bengaluru	Fan 1, Red group (45B)	60.33	77.67
7	Tiger Flame	Exotic	Sunskit × Unknown	CSIR-NBRI, Lucknow	Fan 1, Red Group 38(A)	67.08	116.17
8	Kalima	Indian	Open pollinated seedling of Sylvia	CSIR-NBRI	Fan 1, Red group (45B)	49.33	115.5
9	Neelima	Indian	Snow Princess × Tropic Sea	CSIR-NBRI, Lucknow	Fan 2, Purple group 77(B)	52.58	115
10	GS-2	Indian	Unknown	ICAR-IARI, New Delhi	Fan 1, Yellow group 4(D)	59.17	103
11	Praha	Indian	Unknown	CSIR-NBRI, Lucknow	Fan 1, Orange Red Group N30(A)	78	109.67
12	Anjali	Indian	Sancerre × Rose Spire	ICAR-IARI, New Delhi	Fan 4, White group NN155(B)	52.5	117.67
13	Malaviya Shatabdi	Indian	Induced mutant of Punjab Dawn	BHU, Varanasi, UP	Fan 2, Red purple group 69 (C)	52.58	72.33
14	Roshni	Indian	Friendship Pink × Red Beauty	CSIR-NBRI, Lucknow	Fan 1, Red group 43(B)	62.42	88.67
15	Yellow Stone	Exotic	Unknown	PAU, Ludhiana	Fan 1, Yellow group 8(C)	62.67	87.33
16	Dhanvantari	Indian	Jr Prom × Lucky Star	ICAR-IARI, New Delhi	Fan 1, Yellow group 4(D)	72.5	96.17
17	Punjab Morning	Indian	Sancerre × White Prosperity	PAU, Ludhiana	Fan 2, Red purple group 65©	53.75	109.33
18	Rose Supreme	Exotic	Unknown	PAU, Ludhiana	Fan 1, Red Group 48(D)	74.58	110.5
19	Punjab Glance	Indian	Happy End × Yellow Stone	PAU, Ludhiana	Fan 1, Red Group 38(A)	50	90.17
20	Sancerre	Exotic	Unknown	ICAR-IARI, New Delhi	Fan 4, White group NN155(B)	60.92	104.83
21	Pusa Shagun	Indian	White Oak × Oscar	ICAR-IARI, New Delhi	Fan 1, Orange Red Group N30(B)	70.83	115.33
22	Punjab Glad 2	Indian	Unknown	PAU, Ludhiana	Fan 1, Yellow group 8(D)	54.17	87.33
23	Pusa Shabnam	Indian	Lucky Shamrock × Green Lilac Open	ICAR-IARI, New Delhi	Fan 1, Yellow group 8(D)	68.58	90
24	Punjab Dawn	Indian	Suchitra × Melody	PAU, Ludhiana	Fan 1, Red Group 38(A)	54.67	97.5
25	Arka Tilak	Indian	Watermelon Pink × Lady John	ICAR-IIHR, Bengaluru	Fan 1, Orange red group N30A	51.17	120
26	Victor	Exotic	Unknown	ICAR-IARI, New Delhi	Fan 3, Yellow Green 154(D)	77.5	115
27	Pusa Lohit	Indian	Creamy Green × American Beauty	ICAR-IARI, New Delhi	Fan 1, Red group 44(D)	54.17	109
28	Malaviya Kiran	Indian	Induced mutant of Pusa Kiran	BHU, Varanasi, UP	Fan 4, White group NN155(A)	48.75	108
29	Pusa Manmohak	Indian	Mayur × Hunting Song	ICAR-IARI, New Delhi	Fan 1, Red group (40B)	55.83	110.83
30	Pusa Sindhuri	Indian	Open pollinated seedling of Little Fawn	ICAR-IARI, New Delhi	Fan 1, Red group 51(A)	59	107.67
31	Arka Nazrana	Indian	Black Jack × Friendship	ICAR-IIHR, Bengaluru	Fan 2, Red purple group 61(B)	48.25	95.67
32	Nova Lux	Exotic	Unknown	CSIR-NBRI, Lucknow	Fan1, Yellow group 11(B)	63.92	107.17
33	Euro Vision	Exotic	Unknown	CSIR-NBRI, Lucknow	Fan 1, Red group 40(A)	60.08	107.83
34	Lady Jane	Exotic	(Golden Measure × Belinda) × (Maid of Orleans × Picardy)	ICAR-IIHR, Bengaluru	Fan 1, Red group 41(B)	47.58	104
35	Jacksonville Gold	Exotic	Unknown	PAU, Ludhiana	Fan1, Yellow group 6(D)	64.83	113.5
36	Punjab Lemon Delight	Indian	Jacksonville Gold × White Prosperity	PAU, Ludhiana	Fan 1, Yellow group 8(D)	50.08	102
37	Arka Aayush	Indian	Gold Medal - 412 × Poonam	ICAR-IIHR, Bengaluru	Fan 1, Red group 41(B)	48.5	114.5
38	Pusa Sringarika	Indian	Mayur × Heady Wine	ICAR-IARI, New Delhi	Fan 2, Pink group NN 74(B)	61.08	119
39	Pusa Red Valentine	Indian	Open pollinated selection from Regency	ICAR-IARI, New Delhi	Fan 1, Red group 45 (C)	59.33	101.33
40	Neel Rekha	Indian	Unknown	ICAR-IARI, New Delhi	Fan 2, Red-purple group 64 (B)	63.75	89.5
41	Yellow Star	Exotic	Parade × Moon Mirage	BHU, Varanasi	Fan 1, Yellow group 10(B)	50	117.17
42	Creamy Green	Exotic	Unknown	ICAR-IARI, New Delhi	Fan 4, White group NN155(D)	51.92	99.5
43	Friendship	Exotic	(Maid of Oleans × Picardy) × (Gloaming × Seedling)	ICAR-IARI, New Delhi	Fan 4, White group NN155(D)	65.33	122.5
44	Pink Lady	Exotic	(Pink Prospector × Pink Plume) × (Pale Moon × Galah)	ICAR-IARI, New Delhi	Fan 1, Red group 49 (C)	56.67	103.83
45	Arka Sapna	Indian	Green Woodpecker × Friendship	ICAR-IIHR, Bengaluru	Fan 4, White group 155(B)	45.42	85.33
46	Arka Kesar	Indian	Vink's Glroy × Sagar	ICAR-IIHR, Bengaluru	Fan 1, Orange group 29(B)	61.83	89.83
47	Pusa Suhagin	Indian	Open pollinated seedlings of Sylvia	ICAR-IARI, New Delhi	Fan 1, Red group 46(A)	43.58	114.83
48	Pusa Urmi	Indian	Berlew × Heady Wine	ICAR-IARI, New Delhi	Fan 2, Pink group NN74(A)	59.67	96.17
49	Pusa Chirag	Indian	Cygnet × Little Fawn	ICAR-IARI, New Delhi	Fan 1, Red group 41(C)	53.33	107.67
50	Nicole	Exotic	Sister of Jessica × Promise	CSIR-NBRI, Lucknow	Fan 1, Orange red 30(A)	53.08	106.33
51	Pusa Archana	Indian	Creamy Green × American Beauty	ICAR-IARI, New Delhi	Fan 2, Red purple 68(B)	67.92	106
52	Arka Darshan	Indian	Watermelon Pink × Shirley	ICAR-IARI, New Delhi	Fan 2, Red purple 63(B)	50	104.33
53	Plumtart	Exotic	Last Rose × Jack of Spades	ICAR-IARI, New Delhi	Fan 2, Red purple 71(B)	64.17	108.5
54	Pusa Sarang	Indian	Open pollinated seedling of White Oak	ICAR-IARI, New Delhi	Fan 2, Purple group 76(A)	69.75	101
55	Fidelio	Exotic	Unknown	CSIR-NBRI, Lucknow	Fan 2, Purple-violet group N80(A)	51.08	106.33
56	Urmil	Indian	Tinker Belle × Break O’Dawn	ICAR-IARI, New Delhi	Fan 2, Purple-violet group N80(B)	52.42	93.83
57	Lucky Shamrock	Exotic	(Lemon Lime × Green Ice) (Green Ice × Green Ruffles)	ICAR-IARI, New Delhi	Fan 1, Orange red group 33(D)	68.5	110.5
58	Delhi Callianthus	Indian	Unknown	ICAR-IARI, New Delhi	Fan 1, Red group 43(C)	57	108.67
59	Pusa Urvashi	Indian	Open pollinated seedlings of Red Soft Glow	ICAR-IARI, New Delhi	Fan 2, Red purple 70(A)	52.83	95.33
60	Pusa Chandni	Indian	Green Woodpecker × White Butterfly	ICAR-IARI, New Delhi	Fan 1, Yellow group 11(D)	62.67	94.17
61	Suchitra	Indian	Sylvia Seedlings × Jo Wagenaar	ICAR-IARI, New Delhi	Fan 1, Red group 56(B)	54.5	93.5
62	Surya Kiran	Indian	Unknown	ICAR-IARI, New Delhi	Fan 1, Red group 37(B)	54.17	99
63	Arka Amar	Indian	Watermelon Pink × Arka Aarti	ICAR-IIHR, Bengaluru	Fan 1, Red group 48(B)	57.17	116.33
64	True Love	Exotic	Unknown	CSIR-NBRI, Lucknow	Fan 2, Red purple N66(C)	52.33	118.67
65	Peter Pear's	Exotic	Salome × Maolete	ICAR-IARI, New Delhi	Fan 1, Orange Red group 32(C)	63.58	90.33
66	Pusa Shweta	Indian	Wind Song × Pink Frost	ICAR-IARI, New Delhi	Fan 4, White group 155(B)	54.83	112.5
67	Arka Poonam	Indian	Geliber Herald × R.N. 121	ICAR-IIHR, Bengaluru	Fan 4, White group 155(A)	54.08	114.5
68	Pusa Srijana	Indian	Berlew × Heady Wine	ICAR-IARI, New Delhi	Fan 2, Red purple group 71(C)	50.08	97
69	Pusa Gulal	Indian	Snow Princess × Viola	ICAR-IARI, New Delhi	Fan 2, Red purple 61(B)	51.75	100.5
70	Vicki Lin	Exotic	Unknown	ICAR-IARI, New Delhi	Fan 1, Orange red group 33(D)	60.75	101.33
71	African Star	Exotic	Unknown	ICAR-IARI, New Delhi	Fan 1, Red group 48(C)	57.33	112.5
72	Arka Gold	Indian	Green Bay × Gold Medal - 412	ICAR-IIHR, Bengaluru	Fan 1, Yellow group 8(D)	60.08	114.83
73	Pusa Kiran	Indian	Open pollinated seedlings of Ave	ICAR-IARI, New Delhi	Fan 1, Yellow group 11(D)	63.25	92.5
74	Arka Aarti	Indian	Shirley × Melody	ICAR-IIHR, Bengaluru	Fan 1, Red group 44(B)	58.83	107
75	Arka Naveen	Indian	74-39-1 × Tropic Sea	ICAR-IIHR, Bengaluru	Fan 2, Violet group 84 (C)	52	113.33
76	Apple Blossom	Exotic	Beauty’s Blush × Rose Charm	ICAR-IARI, New Delhi	Fan 1, Yellow group 11(D)	63.58	85.33
77	Punjab Pink Elegance	Indian	Suchitra × White Prosperity	PAU, Ludhiana	Fan 1,Red group 56 (D)	46.75	103.5
78	Vink's Glory	Exotic	Unknown	CSIR-NBRI, Lucknow	Fan 1, Yellow group 8(C)	57.33	106.33
79	Pusa Bindiya	Indian	Open pollinated seedling of Ratna’s Butterfly	ICAR-IARI, New Delhi	Fan 1, Red group 36(D)	65.5	104.17
80	Pusa Mohini	Indian	Ave × Christian Jane	ICAR-IARI, New Delhi	Fan 2, Pink group NN74(C)	66.92	106.33
81	Summer Sunshine	Exotic	Aurora × Sunkist	ICAR-IARI, New Delhi	Fan 1, Yellow group 6(C)	60.83	118
82	Algarve	Exotic	Priscilla × Antonio	ICAR-IARI, New Delhi	Fan 1, Orange group 25(B)	64.33	116
83	Malaviya Kundan	Indian	Induced mutant of Tiger Flame	BHU, Varanasi, UP	Fan 1, Yellow orange 18(B)	51.92	118.33
84	C.P.G	Indian	Unknown	PAU, Ludhiana	Fan 1, Red group 46(A)	40.42	115.67

## Sheet: Table S2
Table S2. SSR markers selected for the study, primer sequence, amplification type and annealing temperature
Sl. No	Marker Name	Forward Primer (5'-3')	Reverse Primer (5'-3')	A/NA	Tm (°C)	Allele size (bp)	Nature of allele
Chloroplast derived SSRs (cPSSRs) of Gladiolus
1	G1SSR	CCTTGGTATGGAAACCTGCTAA	ATAGATCCACAATTTCTCCCCA	A	60	320	Monomorphic
2	G2SSR	GGTATGGAAACCTGCTAAGTGG	TAGATCCACAATTTCTCCCCAT	A	60	310	Monomorphic
3	G3SSR	GGAAGCTGTTCTAACGAATGGA	TATTGGGGATAGAGGGACTTGA	A	60	370	Monomorphic
4	G4SSR	GGAGACTGACTAGGGCAAAAGA	AACTCCTTGACGCATTACGACT	A	60	380	Monomorphic
5	G5SSR	GCTCACAACAATAATCCTTCCC	CAATGAACTCAGCAATACCAGC	A	60	270-300	Polymorphic
6	G6SSR	GAAGAAGCGTGAGAAATCCATA	GGACCAACCGCAATAAATAA	A	60	350	Monomorphic
7	G7SSR	GTGTCTTCGGTGCTTTTCTCTT	CAGCGATAACCTAGAACGAACA	A	60	260-320	Polymorphic
8	G8SSR	TCTATGTCAGTGCTCTACCGGA	GAAGCAAACGAGTCTGTGGAC	A	60	280-300	Polymorphic
9	G9SSR	TATAGAGGAATGCGTGTCCGAT	TACTGCATGACGAGGAAATCAC	A	60	400-420	Polymorphic
10	G10SSR	TGCCACTCCAGCATAACTTCTA	ACTCCTTTTCCTCCCATTCTTC	A	60	310-330	Polymorphic
11	G11SSR	AAAGTCCCTCCTCTCCTCTGAT	GAGCTTGTTACTGAACGGAACC	A	60	480-510	Polymorphic
12	G12SSR	GGCATCCTTCCTCTCCGT	CGGCCTTGGGTGTAGAAGTAG	A	60	200-240	Polymorphic
Genomic SSRs from Gladiolus palustris
13	GP1	TTCTGCAAAGCTAACAGGCG	CCACTGCCATTATCGGTCGA	NA	-	NA	-
14	GP2	TTGTTACTGGTGCGGACTCC	CAGGTCCGATTGCTTGAGGA	A	58	210-270	Polymorphic
15	GP3	TTTGGGACGGGTATGCGTAG	TTCGCTTTCGTGGAAGTCCA	A	55	250-300	Monomorphic
16	GP4	ATGCCTTTGTCCTCTCACCT	TTTGTCCCTAATTGGAACACGTC	A	(59°C-54 °C, -0.5 °C per cycle)	180-310	Polymorphic
17	GP5	CGGGAATAGCAACTACCCGG	GTTGCCCTTGCGGTTGATC	A	55	110	Monomorphic
18	GP6	ATTGCCAAGGAGGTACAGGC	GCAAACCCACTCTGCTTCCT	A	54	110	Monomorphic
19	GP7	CCAAGTAAGTGATGGCGGC	GGGTCTAGAGAAGGCTTGGG	A	56	190-210	Polymorphic
20	GP8	GTGGGTTCCAAGCTTGCATG	TCATTGGCCGCGACAGAG	A	56	≈180-200	Not scorable
21	GP9	TGAAACCCTACACGTAACCCT	ATGTAGGGTGATGGTGGCTG	NA	-	NA	-
22	GP10	ACATTCCTATTTGGACGGTCCA	AGTTCCCTAGTCATCTATGGCT	NA	-	NA	-
23	GP11	ACGTGAGTGATCAATTAAAGGGC	CAACAGCACTGTGAGCACC	NA	-	NA	-
24	GP12	ATCCCTTTCCTAATTCCTTCCC	TGATGAAGAGGATTCCGACGAC	A	54	180	Monomorphic
25	GP13	AAACCCTCACTTCGGAGATCA	TAAAGTCAGTCAGCTGTAACACTG	A	54	280-300	Polymorphic
26	GP14	TCGGAAGGTAACAGAGGGAAC	GTCGAAACAGAGGAGATCGGG	NA	-	NA	-
27	GP15	GGGTCATCGCCTGTCATGAA	TCGTATCGGCTTGTTGGCTG	A	54	190-220	Polymorphic
EST SSRs from Iris spp.
28	IM9	TGTGTAAGAAGAAGTGCAGTTTGA	TGGAGCCTCTGGTACTTGCT	NA	-	NA	-
29	IM27	ACTGCTCTTGCATTTTACTTC	ATTACGAATTGCTTGCGTGAG	A	52	220-260	Monomorphic
30	IM31	AAGCAAAAGGTTTTCCATTCC	GTTTCTTGTCGAGGAACATGC	A	52	300-420	Polymorphic
31	IM37	AGAGAGGTGAGGTGAGGGTTT	CTTCCATCGTGTCCGAGTATG	NA	-	-	-
32	IM38	TCCTCCCTCACTCTCTTCCAT	AAAGCTCAGGCTACGCACAT	NA	-	-	-
33	IM39	CCCTAGCAAACATCTCTTCCA	TGTTATCAGCAAGCAGTCCAG	A	(59-54 °C, -0.5 °C per cycle)	380-500	Polymorphic
34	IM46	GAAGTTGGGAAACGACCATTA	GGGTTATGGTTAGGGTTAGGG	NA	-
35	IM86	GGGTTTGTATTGTTTGTTGGAGA	GGGTGATGTGGTCCTTGTAGA	A	60	200-220	Polymorphic
36	IM108	TCTCCTCCTGTCCGTCTATCC	AGTCGTCCAAATCTCCGAACT	A	(50°C- 45°C, -0.5 °C per cycle)	320-390	Polymorphic
37	IM112	ACGAGAAGAAGGAAGCCAAAC	TCTCAACAAACATAACGGCAAA	A	(55°C– 50 °C, -0.5 °C per cycle)	200-300	Not scorable
38	IM113	GCAAGCATACGTTCCACAAGT	GCGACACATCATACACAAACG	NA	-	-	-
39	IM114	CAAGTGTTACAAAGTGAGAAGAAGGA	ATTCTCCAGAAGTCCGACACA	A	60	620	Monomorphic
40	IM123	GTTTCATGGAGGAGTTGCAGT	TATCTTGCGGGTCTTCTTGG	A	(50°C- 45°C, -0.5°C per cycle)	320	Monomorphic
41	IM151	TTGTTCTCAGTCCAGCTCCAG	TCTTCTCCTCCACCTCCTGTT	A	52	580-850	Monomorphic
42	IM221	CCTTTCCGTTCCATTCTAGAGAC	CCAAACTCTCTCCCTTGACCT	NA	-	-	-
43	IM223	AATCATCACCCACCTCCATTT	TCATCCACAATTAGGGTTCCA	NA	-	-	-
44	IM224	AGAGAAGAGAGCATGGCGATA	GCGAGAAGTGGCATAAAGAGA	A	46	200-280	Polymorphic
45	IM234	ACCAAATGATGGCTGCTGTTA	CAAGAGTTCCGTTGAGGTGAG	NA	-	-	-
46	IM242	CCATCGTCTATCTCCACTCCA	GGACTGCTCCGATAGCTTCTT	NA	-	-	-
47	IM226	GTTGTCTACCATGTCCAACTTCC	TATTGTGGTGTCCCATGCTTT	NA	-	-	-
48	IM309	TGAAATCCAAAGCCAAACAAG	GCTCGTACTTCTCCATTGCTG	NA	-	-	-
49	IM408	AAGAAACCATAATATACAAATTGAAG	GCTCGTTGAGGAAGATGACAG	NA	-	-	-
50	IM400	CCCACTTTCTCATTCCTCTCC	CTGCAGAAGAAGAGCTCGACA	A	52	550	Monomorphic
51	IM158	CCAACCTACCAATCCCTCTTC	GATTAGCCAGCAGTCCTCCTT	NA	-	-	-
52	IM60	TACTTGGAGTTGTGGCTGGTT	AGATTGGAGAAAGGGAAGCAC	A	54	200	Monomorphic
Genomic SSRs from Crocus sativus
53	Cs2	ATACGGTAACATCAGGAAG	AGTAATCCACGCGTCAAGGT	A	52	550	Monomorphic
54	Cs8	GTGTAATGAATGGGATATATGGC	CCTTCCAACTGTGAAATAATTCC	NA	-	-	-
55	Cs10	GGATGTACTTAGGTTGTG	GGAAACCCTAACTAGGT	A	52	≈ 450	Not scorable
56	Cs11	CCCAACTGACCTTCCAACTG	GTTGTTATGATGGTCTGGCC	A	52	≈ 500	Not scorable
57	Cs20	CAATCTTTACATAGTGAGGC	GTATTCTGGTCAGTTCAGTG	NA	-	-	-
58	Cs21	TACCCTATAAAGAGTGGACA	GCTGCCTAGTAATGTGTAAG	A	54	120-160	Monomorphic
59	Cs28	AACCACTGAGGAAGGAC	GGTAGAATACCTTATCGGTT	A	52	≈150	Not scorable
Genomic SSRs from Herbertia zebrina
60	HZ4	TAGGCCCCACCAACGTATAA	AACACGTCATCTTCGTCTTCC	NA	-	-	-
61	HZ5	TTGGGTTGTATCTCGTATCTGG	TGCCATGTACATCCCTTAAATC	NA	-	-	-
Genomic SSRs from Sysirinchium micranthum
62	SM-A10	TATTTGCTGATTTCTTGTTTTA	TCTGTATGAATAGCCTCTTTTT	NA	-	-	-
63	SMB5	ATTATCAGCCAAAACAAAGAAGG	TAGCCGGTGCAATAGGTAAAG	NA	-	-	-
Genomic SSRs from ITS regions (Intergenic spacers)
64	psbA F -trnH R	GTTATGCATGAACGTAATGCTC	CGCGCATGGTGGATTCACAAATC	A	58	650	monomorphic
65	trnL F-trnH R	AAAATCGTGAGGGTTCAAGTC	GATTTGAACTGGTGACACGAG	A	58	260	monomorphic
Note: A – Amplified; NA – Not amplified; Tm -Annealing temperature

## Sheet: Table S3
Table S3. Source of SSRs and their amplification pattern in gladiolus
Sl. No	Species/genera	Type of marker	No. of screened primers	No. of amplified primers	Amplification %	No. of Polymorphic markers
1	Gladiolus spp.	Chloroplast SSRs	12	12	100	7
2	Gladiolus palustris	Genomic SSRs	15	10	66.66	5
3	Iris spp.	EST derived SSRs	25	12	48	5
4	Crocus sativus	Genomic SSRs	7	5	71.42	0
5	Herbertia zebrina	Genomic SSRs	2	0	0	0
6	Sysirinchium micranthum	Genomic SSRs	2	0	0	0
7	Chloroplast DNA regions (Intergenic spacers)	Chloroplast SSRs	2	2	100	0
	Total		65	41	63.07	17

## Sheet: Table S4
Table S4. The Ewens-Watterson Test for Neutrality of SSR loci for overall gladiolus genotypes
Locus	Obs. F	Min F	Max F	Mean*	SE*	L95*	U95*
G5	0.36	0.25	0.96	0.6	0.03	0.32	0.93
G7	0.78	0.25	0.96	0.59	0.03	0.32	0.93
G8	0.42	0.33	0.98	0.69	0.04	0.36	0.98
G9	0.89	0.5	0.99	0.82	0.03	0.5	0.99
G10	0.69	0.25	0.96	0.59	0.03	0.31	0.94
G11	0.4	0.33	0.98	0.7	0.03	0.39	0.98
G12	0.3	0.25	0.96	0.6	0.03	0.32	0.93
GP2	0.94	0.33	0.97	0.69	0.03	0.37	0.97
GP4	0.58	0.17	0.92	0.43	0.02	0.23	0.81
GP7	0.36	0.33	0.98	0.7	0.03	0.38	0.96
GP13	0.37	0.33	0.98	0.69	0.03	0.38	0.98
GP15	0.36	0.25	0.96	0.59	0.03	0.32	0.94
IM31	0.31	0.25	0.96	0.58	0.03	0.32	0.93
IM86	0.86	0.5	0.99	0.83	0.03	0.5	0.99
IM108	0.62	0.5	0.99	0.81	0.03	0.5	0.99
IM39	0.84	0.33	0.97	0.69	0.03	0.38	0.97
IM224	0.68	0.25	0.96	0.59	0.03	0.32	0.93
*These statistics were computed upon 1000 permutations for each loci. Observed F value (sum of square of allelic frequency) highlighted in bold lied outside the lower and upper limit of 95% confidence interval.

## Sheet: Table S5_
Table S5 Summary of marker wise genetic diversity measures for all the gladiolus genotypes
Locus	Na	Ne	I	Ho	He	F	Nm	h
G5	4	2.81	1.15	0.53	0.64	0.18	45.02	0.64
G7	4	1.28	0.47	0.09	0.22	0.57	7.08	0.22
G8	3	2.39	0.94	0.19	0.58	0.67	0.31	0.58
G9	2	1.13	0.23	0	0.11	1	3.7	0.11
G10	4	1.45	0.66	0.21	0.31	0.33	18.25	0.31
G11	3	2.51	0.99	0.3	0.6	0.5	2.25	0.6
G12	4	3.35	1.27	0.56	0.7	0.2	82.7	0.7
GP2	3	1.07	0.16	0.06	0.06	-0.03	65.33	0.06
GP4	6	1.74	0.79	0.53	0.42	-0.26	60.17	0.42
GP7	3	2.78	1.06	0.38	0.64	0.41	1.52	0.64
GP13	3	2.7	1.04	0.35	0.63	0.44	3.2	0.63
GP15	4	2.77	1.18	0.62	0.64	0.03	371.47	0.64
IM31	4	3.22	1.25	0.75	0.69	-0.09	10.44	0.69
IM86	2	1.16	0.26	0.12	0.14	0.12	4.16	0.14
IM108	2	1.61	0.57	0.51	0.38	-0.34	69.5	0.38
IM39	3	1.2	0.34	0.15	0.16	0.08	144.84	0.16
IM224	4	1.48	0.63	0.26	0.32	0.19	38.4	0.32
Mean	3.41	2.04	0.76	0.33	0.43	0.24	54.61	0.43
±SE	0.24	0.2	0.09	0.05	0.05	0.08
Note: Na = observed number of alleles; Ne = number of effective alleles; I = Shannon's information index; Ho = observed heterozygosity; He = expected heterozygosity; F = fixation index; h= Nei’s gene diversity; Nm = gene flow

## Sheet: Table S6
Table S6. The details of gladiolus genotypes involved in the present study
Genotype ID	Genotype name	S1	S2	Pop. ID	Cluster ID	PCoA
		Q value
1	Anglia	0.909	0.091	I	I	I	AD =	Admixture
2	Amethyst	0.92	0.08	I	I	I	Subpopulation 1	S1
3	Pusa Gunjan	0.951	0.049	I	I	I	Subpopulation 2	S2
4	Punjab Glad 1	0.834	0.166	I	I	I
5	Aldebaran	0.931	0.069	I	I	I
6	Fire Flame	0.927	0.073	I	I	I
7	Tiger Flame	0.279	0.721	II	II	I
8	Kalima	0.95	0.05	I	I	I
9	Neelima	0.949	0.051	I	I	I
10	GS-2	0.89	0.11	I	I	I
11	Praha	0.938	0.062	I	I	I
12	Anjali	0.963	0.037	I	I	I
13	Malaviya Shatabdi	0.877	0.123	I	I	I
14	Roshni	0.912	0.088	I	I	I
15	Yellow Stone	0.331	0.669	AD	II	I
16	Dhanvantari	0.909	0.091	I	I	I
17	Punjab Morning	0.902	0.098	I	I	I
18	Rose Supreme	0.12	0.88	II	II	II
19	Punjab Glance	0.521	0.479	AD	I	I
20	Sancerre	0.643	0.357	AD	I	I
21	Pusa Shagun	0.096	0.904	II	II	I
22	Punjab Glad 2	0.288	0.712	II	II	I
23	Pusa Shabnam	0.782	0.218	I	I	I
24	Punjab Dawn	0.939	0.061	I	I	I
25	Arka Tilak	0.707	0.293	I	I	I
26	Victor	0.153	0.847	II	II	I
27	Pusa Lohit	0.672	0.328	AD	I	I
28	Malaviya Kiran	0.519	0.481	AD	I	I
29	Pusa Manmohak	0.062	0.938	II	II	I
30	Pusa Sindhuri	0.151	0.849	II	II	I
31	Arka Nazrana	0.904	0.096	I	I	I
32	Nova Lux	0.055	0.945	II	II	I
33	Euro Vision	0.164	0.836	II	II	I
34	Lady Jane	0.513	0.487	AD	I	I
35	Jacksonville Gold	0.183	0.817	II	II	I
36	Punjab Lemon Delight	0.475	0.525	AD	II	I
37	Arka Aayush	0.879	0.121	I	I	I
38	Pusa Sringarika	0.821	0.179	I	I	I
39	Pusa Red Valentine	0.957	0.043	I	I	I
40	Neel Rekha	0.953	0.047	I	I	I
41	Yellow Star	0.949	0.051	I	I	I
42	Creamy Green	0.965	0.035	I	I	I
43	Friendship	0.972	0.028	I	I	II
44	Pink Lady	0.88	0.12	I	I	II
45	Arka Sapna	0.108	0.892	II	II	II
46	Arka Kesar	0.918	0.082	I	I	II
47	Pusa Suhagin	0.958	0.042	I	I	II
48	Pusa Urmi	0.905	0.095	I	I	II
49	Pusa Chirag	0.398	0.602	AD	II	II
50	Nicole	0.217	0.783	II	II	II
51	Pusa Archana	0.078	0.922	II	II	II
52	Arka Darshan	0.291	0.709	II	II	II
53	Plumtart	0.308	0.692	AD	II	II
54	Pusa Sarang	0.531	0.469	AD	I	II
55	Fidelio	0.033	0.967	II	II	II
56	Urmil	0.048	0.952	II	II	II
57	Lucky Shamrock	0.054	0.946	II	II	II
58	Delhi Callianthus	0.076	0.924	II	II	II
59	Pusa Urvashi	0.107	0.893	II	II	II
60	Pusa Chandni	0.123	0.877	II	II	I
61	Suchitra	0.128	0.872	II	II	II
62	Surya Kiran	0.046	0.954	II	II	II
63	Arka Amar	0.864	0.136	I	I	II
64	True Love	0.046	0.954	II	II	II
65	Peter Pear's	0.034	0.966	II	II	II
66	Pusa Shweta	0.034	0.966	II	II	II
67	Arka Poonam	0.183	0.817	II	II	II
68	Pusa Srijana	0.05	0.95	II	II	II
69	Pusa Gulal	0.092	0.908	II	II	II
70	Vicki Lin	0.457	0.543	AD	II	II
71	African Star	0.09	0.91	II	II	II
72	Arka Gold	0.293	0.707	II	II	II
73	Pusa Kiran	0.232	0.768	II	II	II
74	Arka Aarti	0.873	0.127	I	I	II
75	Arka Naveen	0.193	0.807	II	II	II
76	Apple Blossom	0.07	0.93	II	II	II
77	Punjab Pink Elegance	0.062	0.938	II	II	II
78	Vink's Glory	0.039	0.961	II	II	II
79	Pusa Bindiya	0.118	0.882	II	II	II
80	Pusa Mohini	0.058	0.942	II	II	II
81	Summer Sunshine	0.907	0.093	I	I	II
82	Algarve	0.643	0.357	AD	I	II
83	Malaviya Kundan	0.878	0.122	I	I	II
84	C.P.G	0.82	0.18	I	I	II

## Sheet: Table S7
Table S7 Analysis of molecular variance (AMOVA) and F- statistics differentiating subpopulations
Source	df	SS	MS	Est. var.	variance (%)	P value	F-statistics	value
Among subpopulations	1	44.38	44.38	0.46	0.0986	0	Fst	0.1
Among individuals within subpopulations	82	482.35	5.88	1.7	0.3655	0	Fis	0.41
Among individuals within total population	84	209	2.49	2.49	0.5359	0	Fit	0.46
Total	167	735.72		4.65	1

## Sheet: Table S8
Table S8 Summary of genetic differentiation and heterozygosity statistics between subpopulations
Sub populations	S1	S2
Sample size (N)*	35	37
Na	3.12±0.26	3.12±0.17
Ne	1.99±0.21	1.84±0.17
I	0.73±0.10	0.69±0.08
Ho	0.34±0.05	0.32±0.06
He	0.41±0.06	0.39±0.05
F	0.12±0.06	0.22±0.09
Polymorphic loci (%)	0.9412	1
Note: Na = observed number of alleles; Ne = number of effective alleles; I = Shannon's information index; Ho = observed heterozygosity; He = expected heterozygosity; F = fixation index; h= Nei’s gene diversity; Havg = average heterozygosity; Nm = gene flow. * 12 genotypes were excluded from both subpopulations as they were assigned as admixture.
